# Supplementary material for: The Reaction of the Yeast Saccharomyces cerevisiae to Contamination of the Medium with Aflatoxins B2 and G1, Ochratoxin A and Zearalenone in Aerobic Cultures
Source: MDPI journal article supplement (doi:10.3390/ijms242216401), 2023-11-16

## Supplementary Materials:

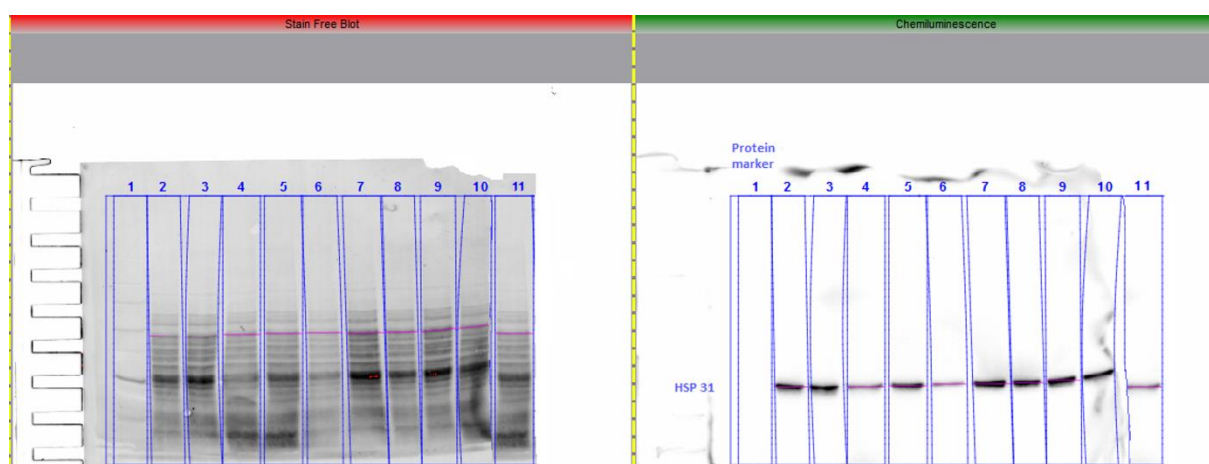

Figure S1: The effect of lower doses of mycotoxins on the production of HSP31 (10 $\mu$ l per well) in aerobic conditions. Image based on graphical analysis performed with Image Lab 6.1 Software comparing stain free blot with the image after chemiluminescence detection of proteins. Lane 1 – protein size marker, lane 2- control, lanes 3, 4, 5 – AFB<sub>2</sub> + AFG<sub>1</sub>, lanes 6, 7, 8 – OTA, lanes 9, 10, 11 – ZEA.

This figure was created based on the two below original figures of Western Blotting:

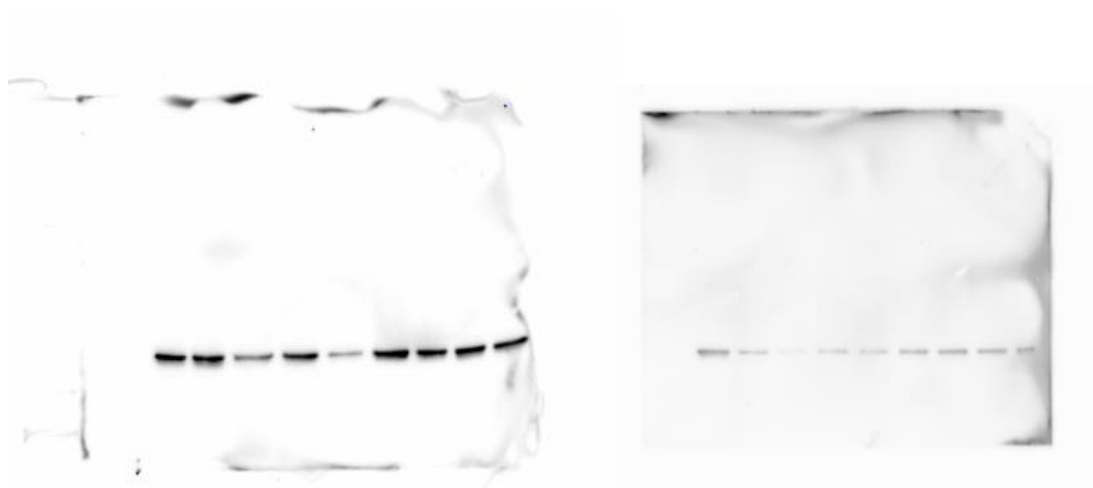

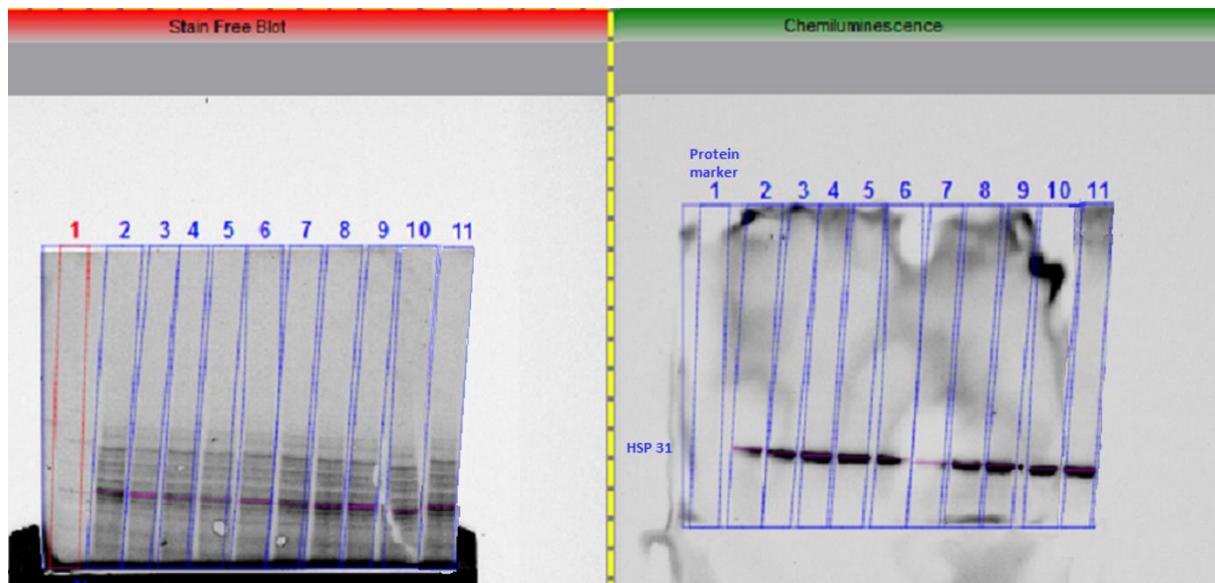

Figure S2: The effect of higher doses of mycotoxins on the production of HSP31 (10 $\mu$ l per well) in aerobic conditions. Image based on graphical analysis performed with Image Lab 6.1 Software comparing stain free blot with the image after chemiluminescence detection of proteins . Lane 1 – protein size marker, lane 2- control, lanes 3, 4, 5 – AFB<sub>2</sub> + AFG<sub>1</sub>, lanes 6, 7, 8 – OTA, lanes 9, 10, 11 – ZEA.

This figure was created based on the two below original figures of Western Blotting:

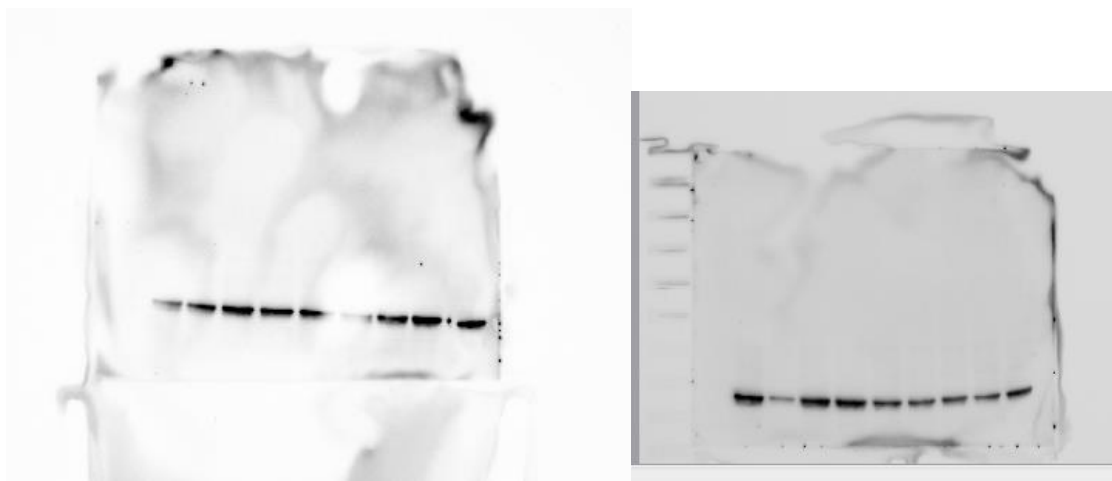

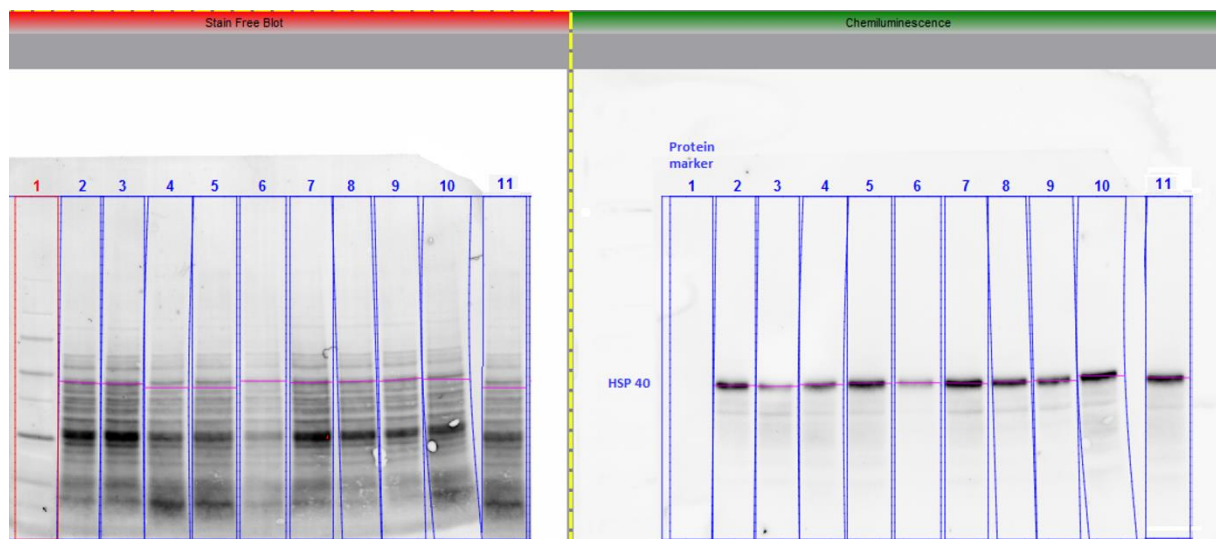

Figure S3: The effect of lower doses of mycotoxins on the production of HSP40 (10 $\mu$ l per well) in aerobic conditions. Image based on graphical analysis performed with Image Lab 6.1 Software comparing stain free blot with the image after chemiluminescence detection of proteins. Lane 1 – protein size marker, lane 2- control, lanes 3, 4, 5 – AFB<sub>2</sub> + AFG<sub>1</sub>, lanes 6, 7, 8 – OTA, lanes 9, 10, 11 – ZEA.

This figure was created based on the two below original figures of Western Blotting:

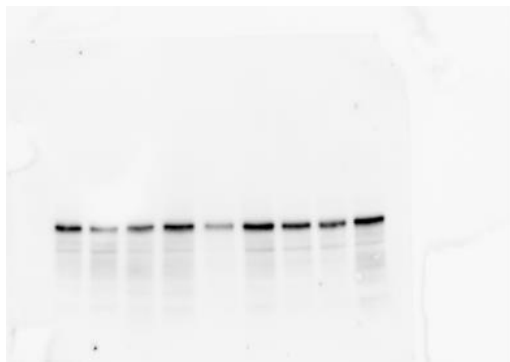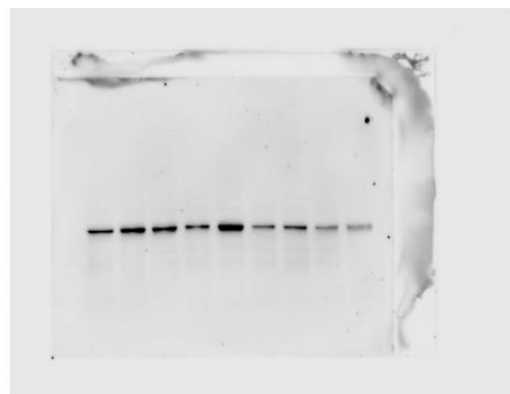

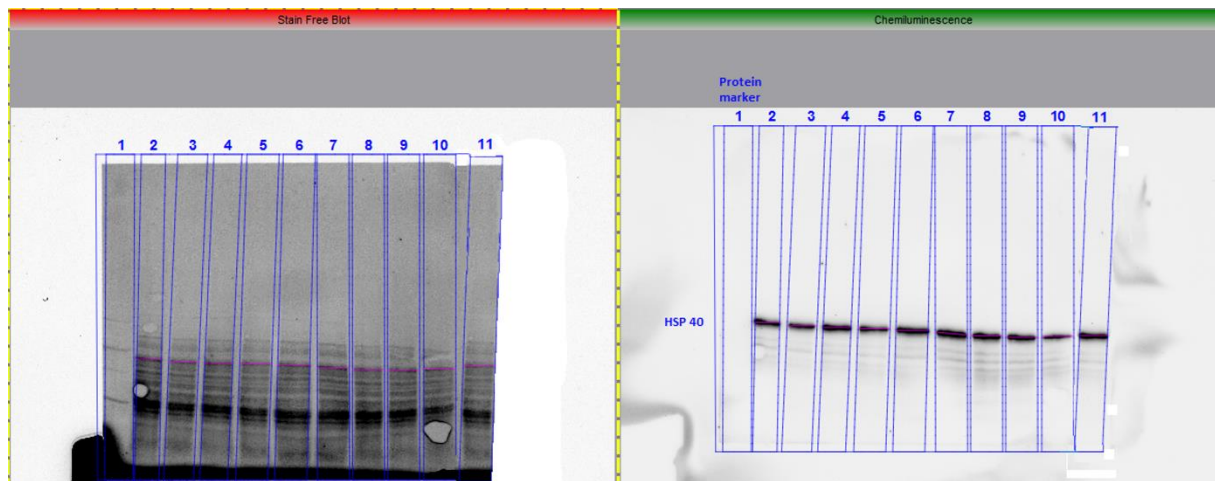

Figure S4: The effect of higher doses of mycotoxins on the production of HSP40 (10 $\mu$ l per well) in aerobic conditions. Image based on graphical analysis performed with Image Lab 6.1 Software comparing stain free blot with the image after chemiluminescence detection of proteins. Lane 1 – protein size marker, lane 2- control, lanes 3, 4, 5 – AFB<sub>2</sub> + AFG<sub>1</sub>, lanes 6, 7, 8 – OTA, lanes 9, 10, 11 – ZEA.

This figure was created based on the two below original figures of Western Blotting:

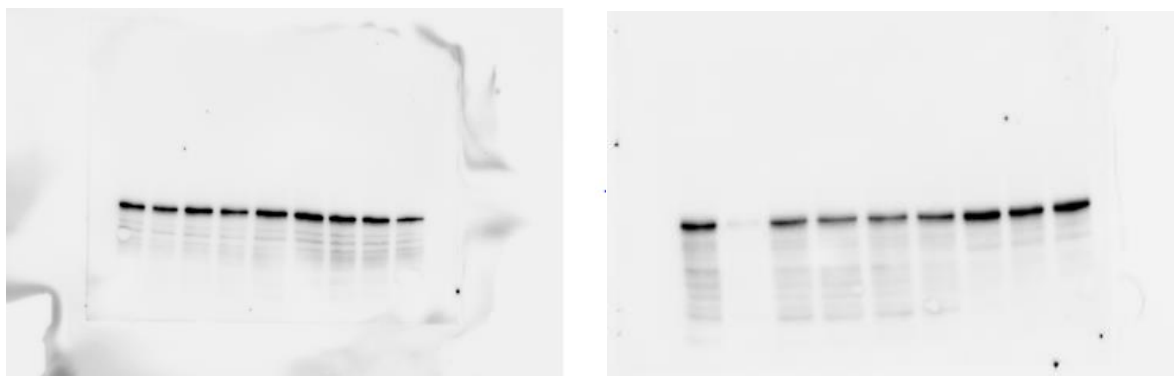

Supplement: s1 [file s1]
